# Supplementary material
Source: Springer Nature journal article supplement (https://www.springermedizin.de/resource/supplementary/12889_2007_1064_MOESM3_ESM.pdf/9503252)

# 002-NN-Wh-F-33yr.old -inj-13 yrs.

**Category**      **Color**

- Criminal Justice/Criminalization
- Drug Use
- Injection
- Education
- Hospitalization/Medical Condition
- Living
- Memorable Event
- Needle Source and Syringe exchange
- Relationship/Bonds
- Sex
- Testing
- Drug Treatment
- Work
- Injection
- Mismatch of intake needs and drug availability
- Devolution

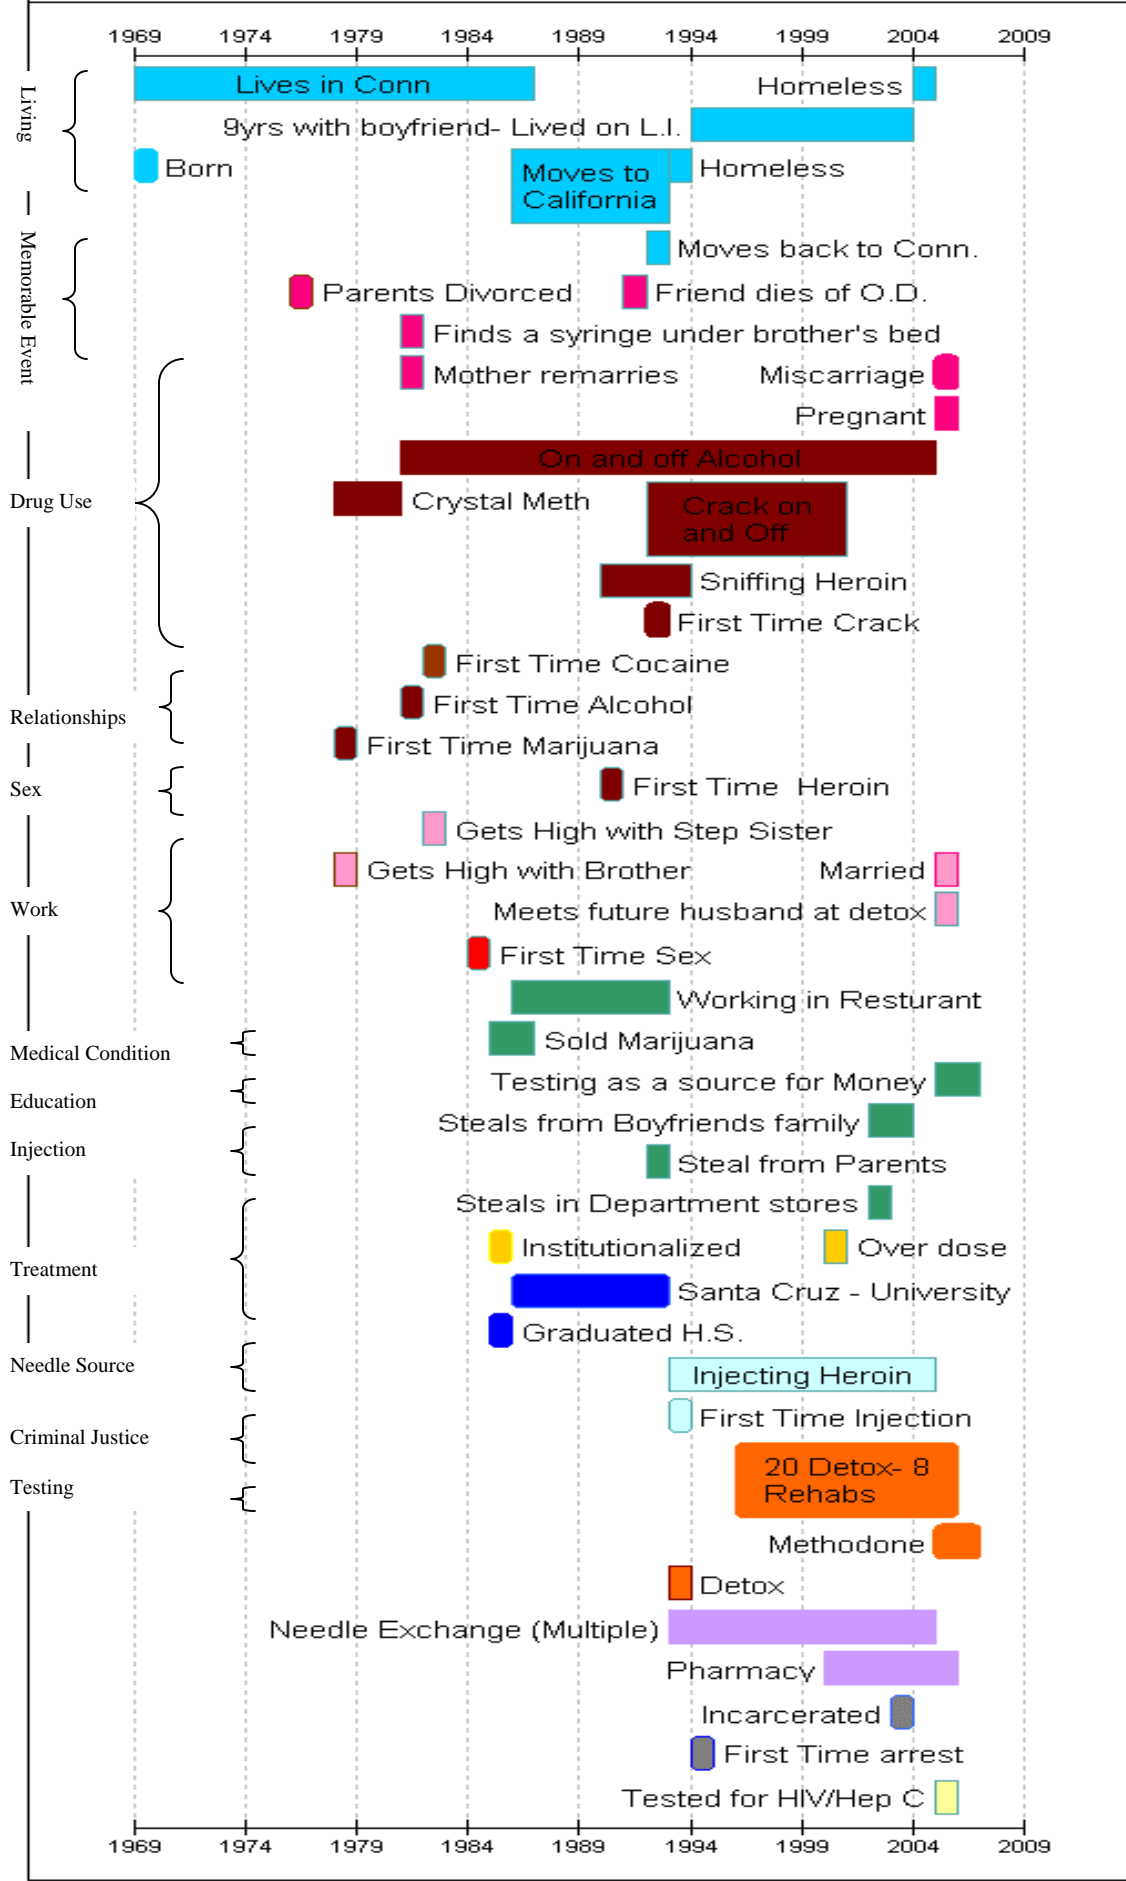

Supplement: MOESM3 [file 9503252]
